# Supplementary figures and images for: Electrical Stimulation Therapy and HA/TCP Composite Scaffolds Modulate the Wnt Pathways in Bone Regeneration of Critical-Sized Defects
Source: MDPI journal article supplement (doi:10.3390/bioengineering10010075), 2023-01-06

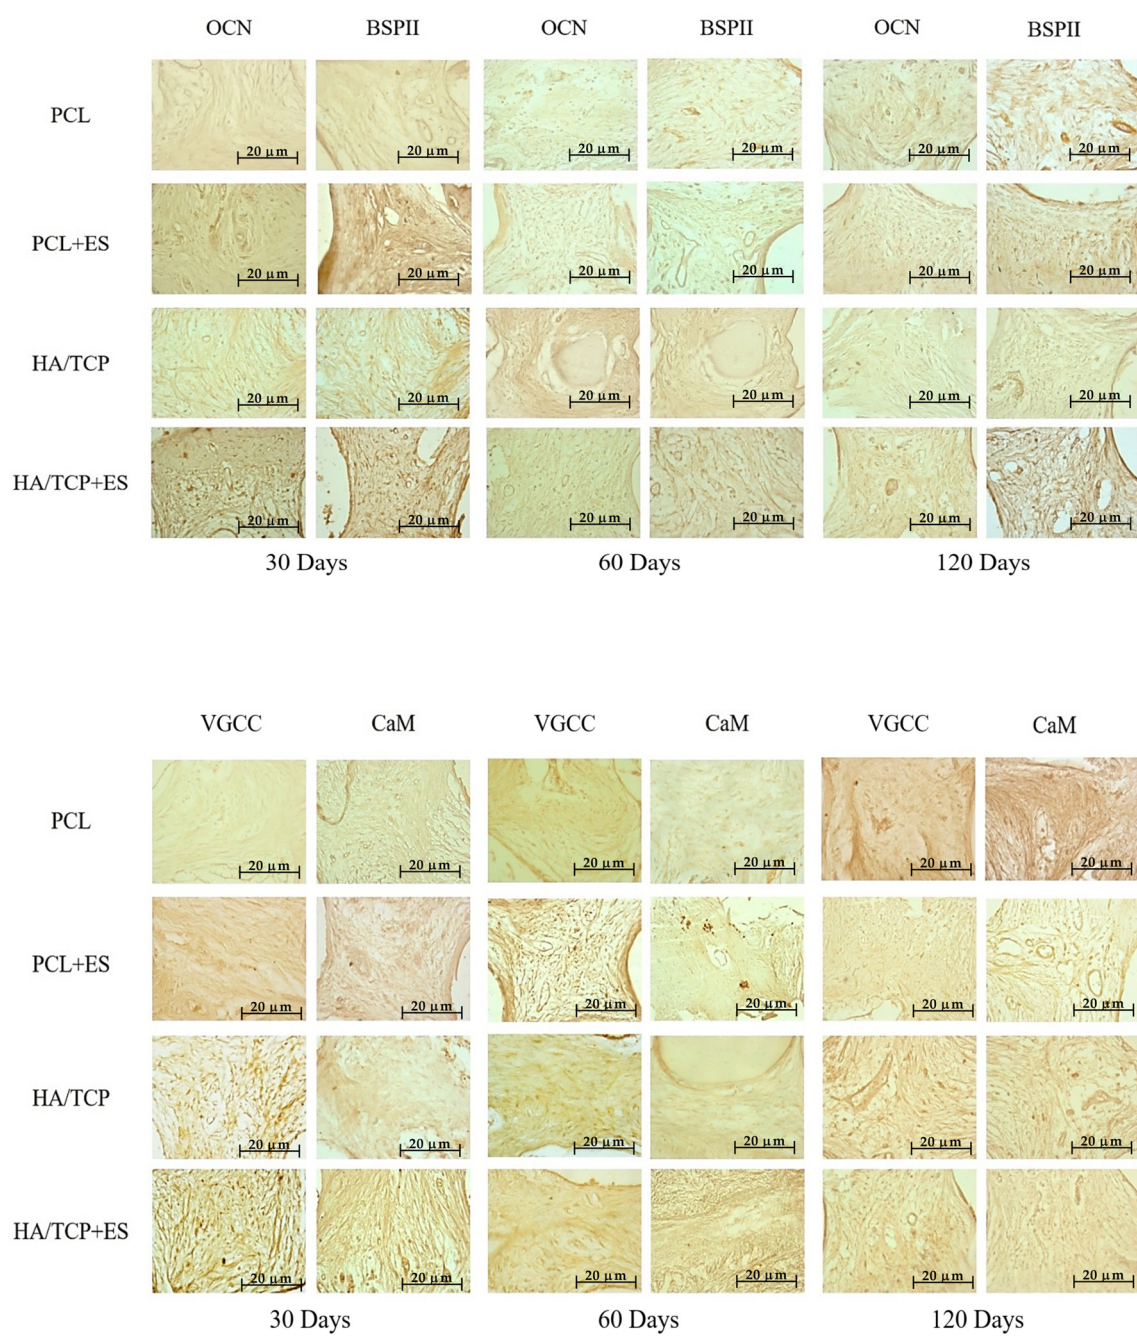

Figure S1. Immunohistochemistry images.

Supplement: s1 [file s1]
